# Supplementary material for: The synthesis of stable 1,3,4-triphenylphospholes
Source: Royal Society of Chemistry journal article supplement (doi:10.1039/b000692k), 2000-01-01
Supplement: b000692k.doc [file b000692k.doc]

# Supplementary Data

**The synthesis of stable 1,3,4-triphenylphospholes**.

**Tuula-A Niemi,*a* Paul L.Coe**a* and Stephen J. Till*b***

*a School of Chemistry, The University of Birmingham, Edgbaston, Birmingham, UK B15 2TT*

*b DERA Malvern*

**Table S1 Crystal Data and Structure Refinement for 2,5-dibromo-1,3,4-triphenylphosphole-1-oxide 11**

| Empirical formula | C22H15Br2OP |
| --- | --- |
| Formula weight | 486.13 |
| Temperature | 293 K |
| Wavelength | 0.71069 Å |
| Crystal system | Orthorhombic |
| Space group | *P*212121 |
| Unit cell dimensions | *a* = 12.6240 Å |
| ** = ** = ** = 90 ˚) | *b* = 24.695 Å |
|  | *c* = 6.0000 Å |
| Volume | 1870.5 Å3 |
| z | 4 |
| Density (calculated) | 1.726 Mg/m3 |
| Absorption coefficient | 4.428 mm-1 |
| F(000) | 960 |
| Crystal size | 0.50 x 0.14 x 0.10 mm |
| Theta range for data collection | 1.65 to 26.34 degrees |
| Index ranges | -15 ≤ h ≤ 15, -29 ≤ k ≤ 27, -7 ≤ l ≤ 7 |
| Reflections collected | 11014 |
| Independent reflections | 3417 [R(int) = 0.0422] |
| Refinement method | Full-matrix least-squares on F2 |
| Data / restraints / parameters | 3417 / 0 / 235 |
| Goodness of fit on F2 | 1.069 |
| Final R indices [I > 2(I)] | *R*1 = 0.0366, *wR*2 = 0.0787 |
| R indices (all data)  *w* = 1/[2(*F*o2) + (0.037*P*)2 + 0.74*P*];  *P* = (*F*o2 + 2*F*c2)/3 | *R*1 = 0.0422, *wR*2 = 0.0821 |
| Absolute structure parameter | 0.008 |
| Largest diff. peak and hole | 0.331 and -0.461 e.Å-3 |

**Table S2** Bond lengths and angles for **11**

| Bond lengths | Å | Bond angles | degrees | Bond angles | degrees |
| --- | --- | --- | --- | --- | --- |
| P-O | 1.427(3) | O-P-C1 | 119.1(2) | C2-C3-C4 | 112.8(4) |
| P-C1 | 1.803(4) | O-P-C4 | 115.0(2) | P-C1-Br1 | 121.4(2) |
| P-C4 | 1.756(4) | O-P-C17 | 112.7(2) | P-C4-Br2 | 119.2(2) |
| P-C17 | 1.767(4) | C1-P-C17 | 108.2(2) | C1-C2-C5 | 126.1(4) |
| C1-C2 | 1.319(5) | C1-P-C4 | 89.6(2) | C2-C3-C11 | 121.8(3) |
| C2-C3 | 1.491(5) | C4-P-C17 | 110.0(2) | C3-C2-C5 | 121.9(3) |
| C3-C4 | 1.349(5) | P-C1-C2 | 113.0(3) | C4-C3-C11 | 125.4(4) |
| C1-Br1 | 1.843(4) | P-C4-C3 | 112.7(3) | Br1-C1-C2 | 125.6(3) |
| C4-Br2 | 1.858(4) | C1-C2-C3 | 112.0(3) | Br2-C4-C3 | 127.9(3) |
| C2-C5 | 1.490(5) |  |  |  |  |
| C3-C11 | 1.454(5) |  |  |  |  |

**Table S3** Atomic coordinates (x 104) and equivalent isotropic displacement parameters (Å2 x 103). *U*(eq) is defined as one third of the trace of the orthogonalised *U*ij tensor. For **11**

|  | *x* | *y* | *z* | *U*(eq) |
| --- | --- | --- | --- | --- |
| Br1 | 11950(1) | 4629(1) | 6512(1) | 66(1) |
| Br2 | 8565(1) | 3321(1) | 11341(1) | 68(1) |
| P | 9788(1) | 4152(1) | 8393(2) | 50(1) |
| O | 9199(3) | 4036(1) | 6420(6) | 72(1) |
| C1 | 11215(3) | 4147(2) | 8275(7) | 47(1) |
| C2 | 11642(3) | 3781(2) | 9598(6) | 39(1) |
| C3 | 10825(3) | 3470(2) | 10855(6) | 41(1) |
| C4 | 9828(3) | 3625(2) | 10354(7) | 46(1) |
| C5 | 12795(3) | 3669(2) | 9855(6) | 41(1) |
| C6 | 13304(3) | 3783(2) | 11728(7) | 51(1) |
| C7 | 14386(4) | 3651(2) | 11927(9) | 65(1) |
| C8 | 14900(4) | 3411(2) | 10299(8) | 64(1) |
| C9 | 14397(3) | 3294(2) | 8451(9) | 62(1) |
| C10 | 13341(3) | 3426(2) | 8187(7) | 50(1) |
| C11 | 11110(3) | 3046(2) | 12428(7) | 41(1) |
| C12 | 10617(3) | 3047(2) | 14409(7) | 49(1) |
| C13 | 10832(4) | 2644(2) | 15874(7) | 58(1) |
| C14 | 11560(4) | 2242(2) | 15383(8) | 56(1) |
| C15 | 12071(3) | 2248(2) | 13473(8) | 52(1) |
| C16 | 11853(3) | 2649(2) | 11982(7) | 46(1) |
| C17 | 9383(3) | 4760(2) | 9693(7) | 47(1) |
| C18 | 8628(3) | 5082(2) | 8758(8) | 53(1) |
| C19 | 8275(4) | 5545(2) | 9809(10) | 66(1) |
| C20 | 8684(4) | 5686(2) | 11719(10) | 68(1) |
| C21 | 9446(5) | 5362(2) | 12650(9) | 81(2) |
| C22 | 9791(4) | 4904(2) | 11659(8) | 68(1) |
